# Supplementary material for: Upconversion nanoparticles-labelled immunochromatographic assay for quantitative biosensing
Source: Royal Society of Chemistry journal article supplement (doi:10.1039/d0nj03156a), 2020-01-01
Supplement: d0nj03156a1.pdf [file d0nj03156a1.pdf]

## Electronic Supplementary Information

### Upconversion Nanoparticles-labelled Immunochromatographic Assay for Quantitative Biosensing

Fengping Hou,<sup>a, b, c</sup> Haiyun Liu,<sup>a</sup> Yun Zhang,<sup>a</sup> Zhendong Gao,<sup>a</sup> Shiqi Sun,<sup>a</sup> Yu Tang,<sup>d</sup>  
Huichen Guo<sup>\*a, e</sup>

<sup>a</sup>State Key Laboratory of Veterinary Etiological Biology, OIE/China National Foot-and-Mouth Disease Reference Laboratory, Lanzhou Veterinary Research Institute, Chinese Academy of Agricultural Sciences, Xujiaping 1, Lanzhou 730046, Gansu, P. R. China.

<sup>b</sup>Molecular and Cellular Biology, Gembloux Agro-Bio Tech, University of Liège, Passage des Déportés 2, 5030 Gembloux, Belgium.

<sup>c</sup>Lanzhou Institute of Biological Products Co., Ltd. (LIBP), a subsidiary company of China National Biotec Group Company Limited (CNBG), Lanzhou 730046, P. R. China

<sup>d</sup>State Key Laboratory of Applied Organic Chemistry, Key Laboratory of Nonferrous Metal Chemistry and Resources Utilization of Gansu Province, College of Chemistry and Chemical Engineering, Lanzhou University, Lanzhou 730000, Gansu, P. R. China.

<sup>e</sup>School of Animal Science, Yangtze University, Jingmi Street, Jingzhou District, Jingzhou 434025, P. R. China.

#### Corresponding Author

Tel: 86-931-8312213; E-mail: guohuichen@caas.cn (H. Guo)

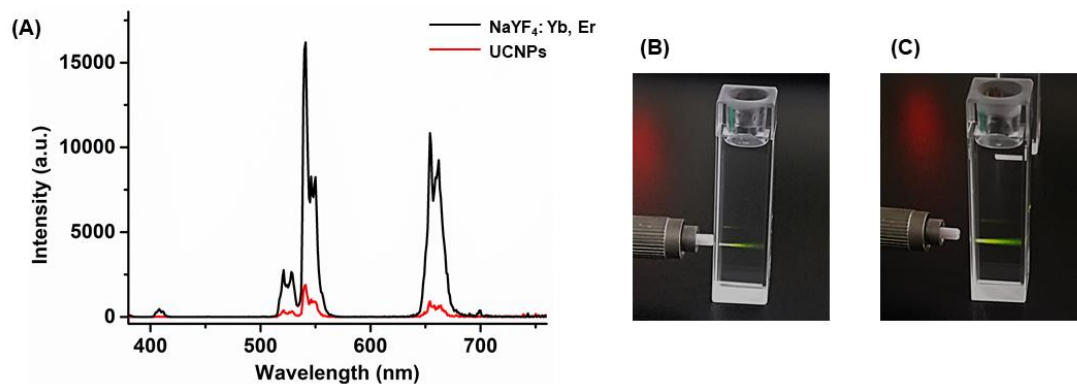

**Fig. S1.** (A) Fluorescence spectra of NaYF<sub>4</sub>: Yb,Er (red line) and UCNPs (black line) at 1 mg/mL in ethanol. Photographs of (B) NaYF<sub>4</sub>: Yb,Er and (C) UCNPs under 980 nm laser.

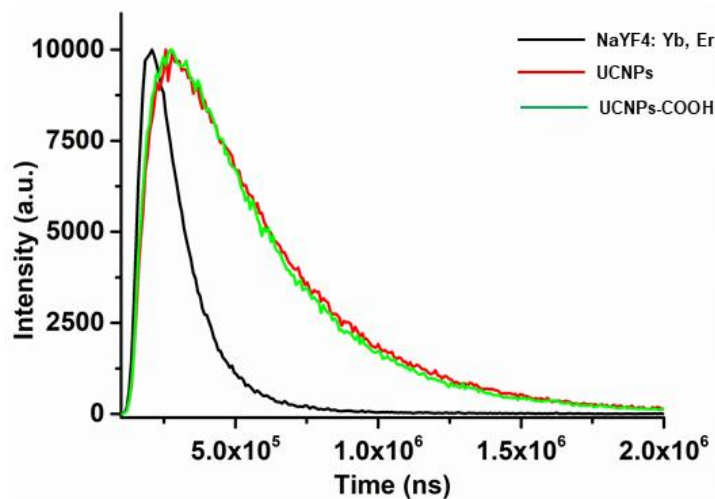

**Fig. S2.** The decay curves at the wavelength of 540 nm for NaYF<sub>4</sub>:Yb,Er (black line), UCNPs (red line) and UCNPs-COOH (green line). Excitation by 980 nm laser.

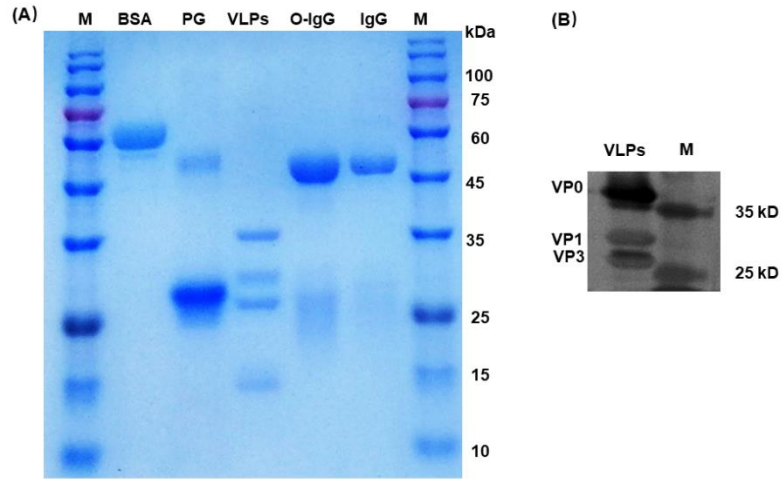

**Fig. S3.** (A) SDS-PAGE of proteins used in the platform. (B) Western blotting of VLPs. Marker (M), Protein G (PG), O-IgG (anti O-FMDV specific antibody) and nonspecific antibody from rabbit (IgG).

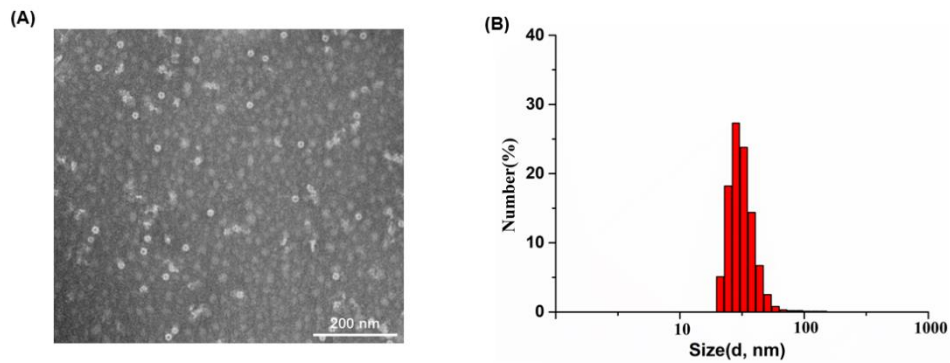

**Fig. S4.** (A) TEM image and (B) DLS size of VLPs.

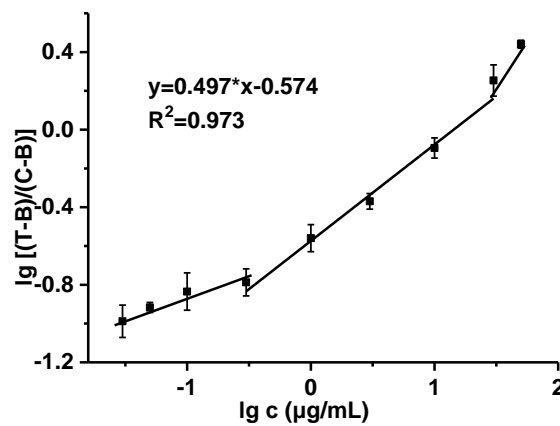

**Fig. S5.** The calibration curve with a broad window of detection. The concentration of antibody ( $0.03 \mu\text{g mL}^{-1}$ ,  $0.05 \mu\text{g mL}^{-1}$ ,  $0.1 \mu\text{g mL}^{-1}$ ,  $0.3 \mu\text{g mL}^{-1}$ ,  $1 \mu\text{g mL}^{-1}$ ,  $3 \mu\text{g mL}^{-1}$ )

<sup>1</sup>, 10  $\mu\text{g mL}^{-1}$ , 30  $\mu\text{g mL}^{-1}$  and 50  $\mu\text{g mL}^{-1}$ ).

Table S1. Reproducibility analysis of the UCNP-based test strips in buffer.

| Concentration<br>( $\mu\text{g mL}^{-1}$ ) | within-run   |       |         | between-run  |       |         |
|--------------------------------------------|--------------|-------|---------|--------------|-------|---------|
|                                            | Signal ratio | SD    | RSD (%) | Signal ratio | SD    | RSD (%) |
| 1                                          | 0.248        | 0.004 | 1.8%    | 0.294        | 0.015 | 5.0%    |
| 5                                          | 0.706        | 0.012 | 1.7%    | 0.710        | 0.004 | 3.5%    |
| 10                                         | 1.047        | 0.015 | 1.4%    | 1.076        | 0.040 | 3.7%    |

within-run variability 1.6%                      between-run variability 4.1%

Table S2. Reproducibility analysis of the UCNP-based test strips in positive sera.

| No. | Signal ratio | SD    | RSD (%) |
|-----|--------------|-------|---------|
| 1   | 0.861        | 0.093 | 10.8    |
| 2   | 0.913        | 0.056 | 6.1     |
| 3   | 1.384        | 0.159 | 11.5    |
